# Supplementary material
Source: Springer Nature journal article supplement (https://www.springermedizin.de/resource/supplementary/12985_2010_1019_MOESM5_ESM.pdf/9608966)
Supplement: MOESM5 [file 9608966]

**EuMV-Jal A**  
+  
**EuMV-Jal B**

**EuMV-Jal A**  
+  
**EuMV-YP B**

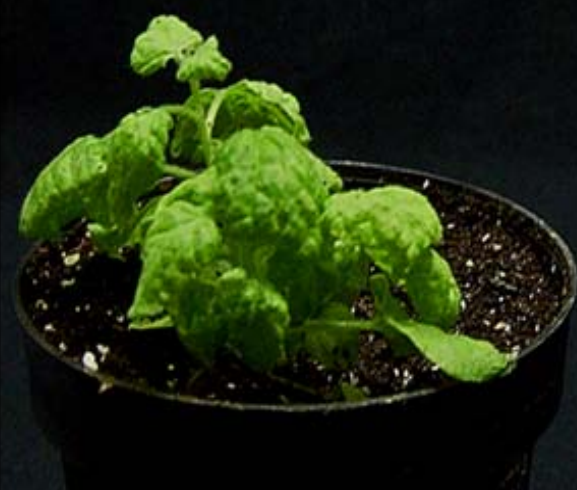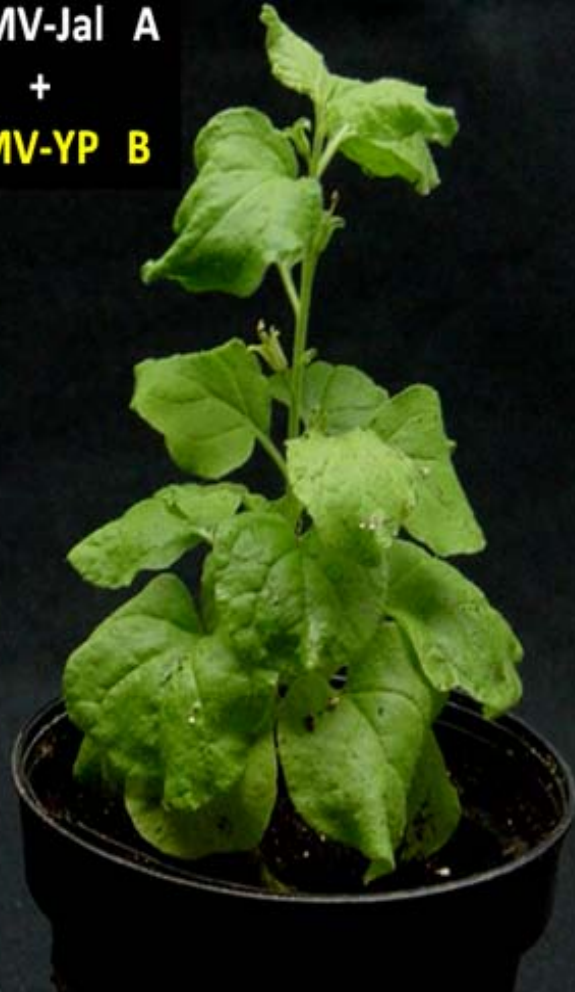

**B**

| <b>Combination</b>    | <b>Plants<br/>infected/<br/>inoculated</b> | <b>No. independent<br/>experiments</b> |
|-----------------------|--------------------------------------------|----------------------------------------|
| EuMV-Jal A+B          | 17/ 18                                     | 3                                      |
| EuMV-Jal A+ EuMV-YP B | 0/ 18                                      | 3                                      |
| EuMV-YP A+B           | 15/ 18                                     | 3                                      |
| EuMV-YP A+ EuMV-Jal B | 0/ 18                                      | 3                                      |
